# Supplementary material for: The Moderating Role of Parenting Dimensions in the Association between Traditional or Cyberbullying Victimization and Mental Health among Adolescents of Different Sexual Orientation
Source: PubMed Central journal article supplement (PMC8001163; doi:10.3390/ijerph18062867), 2021-03-11
Supplement: ijerph-18-02867-s001.pdf [file ijerph-18-02867-s001.pdf]

## Supplementary material

**Table S1.** Regression analyses for negative mental health outcomes and suicidal risk by traditional and cyberbullying victimization and sexual orientation

|                                                                          | <b>Depression</b>                                 | <b>Anxiety</b>                                    | <b>Stress</b>                                     | <b>Suicidal ideation</b>                                             | <b>Suicidal plan</b>                                                 | <b>Suicidal attempt</b>                                              |
|--------------------------------------------------------------------------|---------------------------------------------------|---------------------------------------------------|---------------------------------------------------|----------------------------------------------------------------------|----------------------------------------------------------------------|----------------------------------------------------------------------|
| <b>Model information</b>                                                 | F(7, 918)=21.01,<br>p<0.001; R <sup>2</sup> =0.13 | F(7, 919)=18.57,<br>p<0.001; R <sup>2</sup> =0.12 | F(7, 920)=13.08,<br>p<0.001; R <sup>2</sup> =0.08 | -2LL= 905.87;<br>$\chi^2(7)=79.21$ , p<.001;<br>R <sup>2</sup> =0.13 | -2LL= 473.64;<br>$\chi^2(7)=61.39$ , p<.001;<br>R <sup>2</sup> =0.15 | -2LL= 331.46;<br>$\chi^2(7)=78.44$ , p<.001;<br>R <sup>2</sup> =0.23 |
|                                                                          | <b><math>\beta</math> (B, UNSTANDARDIZED SE)</b>  |                                                   |                                                   | <b>ADJUSTED ODDS RATIO (95% CI)</b>                                  |                                                                      |                                                                      |
| Age                                                                      | 0.11 (0.49, 0.15)**                               | 0.08 (0.30, 0.12)*                                | 0.10 (0.42, 0.14)**                               | 1.01 (0.92; 1.10)                                                    | 0.97 (0.85; 1.12)                                                    | 0.99 (0.83; 1.19)                                                    |
| Gender (ref. girls)                                                      | -0.16 (-2.67,<br>0.53)***                         | -0.16 (-2.24,<br>0.44)***                         | -0.17 (-2.73,<br>0.52)***                         | 0.43 (0.30; 0.60)***                                                 | 0.42 (0.25; 0.72)***                                                 | 0.26 (0.13; 0.52)***                                                 |
| Sexual orientation (ref. heterosexual youth)                             | 0.08 (2.64, 1.06)*                                | 0.08 (2.07, 0.87)*                                | 0.08 (2.38, 1.02)*                                | 1.79 (0.99; 3.26) <sup>o</sup>                                       | 2.66 (1.22; 5.84)*                                                   | 4.24 (1.76; 10.24)**                                                 |
| Traditional victimization                                                | 0.23 (2.67,<br>0.43)***                           | 0.20 (1.86,<br>0.35)***                           | 0.15 (1.58,<br>0.41)***                           | 1.86 (1.48; 2.36)***                                                 | 1.68 (1.28; 2.20)***                                                 | 2.03 (1.51; 2.74)***                                                 |
| Traditional victimization * sexual orientation (ref. heterosexual youth) | -0.03 (-0.95, 1.29)                               | -0.03 (-0.77, 1.07)                               | -0.00 (-0.05, 1.25)                               | 0.79 (0.39; 1.59)                                                    | 0.60 (0.27; 1.31)                                                    | 0.57 (0.26; 1.22)                                                    |
| Cybervictimization                                                       | 0.17 (3.03,<br>0.65)***                           | 0.18 (2.57,<br>0.53)***                           | 0.14 (2.41,<br>0.62)***                           | 1.52 (1.05; 2.19)*                                                   | 2.13 (1.43; 3.16)***                                                 | 2.12 (1.39; 3.24)***                                                 |
| Cybervictimization * sexual orientation (ref. heterosexual youth)        | -0.03 (-1.68, 2.29)                               | -0.01 (-0.35, 1.89)                               | -0.04 (-2.29, 2.21)                               | 0.60 (0.18; 1.97)                                                    | 0.88 (0.24; 3.22)                                                    | 0.82 (0.22; 3.04)                                                    |
| <b>Parsimonious model results</b>                                        |                                                   |                                                   |                                                   |                                                                      |                                                                      |                                                                      |
| <b>Model information</b>                                                 | F(5, 920)=28.88,<br>p<0.001; R <sup>2</sup> =0.13 | F(5, 921)=25.81,<br>p<0.001; R <sup>2</sup> =0.12 | F(5, 922)=17.98,<br>p<0.001; R <sup>2</sup> =0.08 | -2LL= 967.02;<br>$\chi^2(3)=85.81$ , p<.001;<br>R <sup>2</sup> =0.13 | -2LL= 504.91;<br>$\chi^2(3)=60.46$ , p<.001;<br>R <sup>2</sup> =0.14 | -2LL= 352.27;<br>$\chi^2(4)=81.18$ , p<.001;<br>R <sup>2</sup> =0.22 |
|                                                                          | <b><math>\beta</math> (B, UNSTANDARDIZED SE)</b>  |                                                   |                                                   | <b>ADJUSTED ODDS RATIO (95% CI)</b>                                  |                                                                      |                                                                      |
| Age                                                                      | 0.10 (0.46, 0.14)**                               | 0.08 (0.29, 0.12)*                                | 0.09 (0.39, 0.14)**                               | /                                                                    | /                                                                    | /                                                                    |

|                           |                        |                        |                        |                                |                      |                      |
|---------------------------|------------------------|------------------------|------------------------|--------------------------------|----------------------|----------------------|
| Gender                    | -0.15 (-2.64, 0.53)*** | -0.16 (-2.22, 0.44)*** | -0.17 (-2.73, 0.51)*** | 0.43 (0.31; 0.60)***           | 0.49 (0.30; 0.81)*** | 0.28 (0.14; 0.55)*** |
| Sexual orientation        | 0.07 (2.38, 1.04)*     | 0.07 (1.91, 0.86)*     | 0.07 (2.26, 1.01)*     | /                              | /                    | 2.65 (1.09; 6.46)*   |
| Traditional victimization | 0.22 (2.51, 0.40)***   | 0.18 (1.75, 0.33)***   | 0.14 (1.52, 0.39)***   | 1.90 (1.54; 2.35)***           | 1.69 (1.33; 2.13)*** | 1.98 (1.53; 2.56)*** |
| Cybervictimization        | 0.16 (2.88, 0.62)***   | 0.17 (2.53, 0.51)***   | 0.13 (2.21, 0.60)***   | 1.41 (0.99; 2.00) <sup>o</sup> | 2.01 (1.38; 2.92)*** | 1.93 (1.29; 1.29)**  |

**Table S2.** Moderation analyses for parenting styles in the relation between traditional bullying victimization and sexual orientation on negative mental health outcomes and suicidal risk

|                                                   | Depression                                      | Anxiety                                         | Stress                                          | Suicidal ideation                                                | Suicidal plan                                                   | Suicidal attempt                                                 |
|---------------------------------------------------|-------------------------------------------------|-------------------------------------------------|-------------------------------------------------|------------------------------------------------------------------|-----------------------------------------------------------------|------------------------------------------------------------------|
| <b>Model information (non-parsimonious model)</b> | F(13, 882)=17.17, p<0.001; R <sup>2</sup> =0.19 | F(13, 883)=14.85, p<0.001; R <sup>2</sup> =0.17 | F(13, 883)=12.96, p<0.001; R <sup>2</sup> =0.15 | -2LL= 802.10; $\chi^2(13)=148.85$ , p<.001; R <sup>2</sup> =0.23 | -2LL= 426.38; $\chi^2(13)=88.35$ , p<.001; R <sup>2</sup> =0.22 | -2LL= 294.80; $\chi^2(13)=105.39$ , p<.001; R <sup>2</sup> =0.31 |
|                                                   | $\beta$ (B, UNSTANDARDIZED SE)                  |                                                 |                                                 | ADJUSTED ODDS RATIO (95% CI)                                     |                                                                 |                                                                  |
| Age                                               | 0.06 (0.28, 0.15) <sup>o</sup>                  | 0.04 (0.15, 0.12)                               | 0.05 (0.23, 0.14)                               | 0.96 (0.86; 1.06)                                                | 0.91 (0.77; 1.07)                                               | 0.92 (0.75; 1.12)                                                |
| Gender                                            | -0.18 (-3.07, 0.52)***                          | -0.18 (-2.55, 0.44)***                          | -0.19 (-3.02, 0.51)***                          | 0.35 (0.25; 0.51)***                                             | 0.37 (0.22; 0.64)***                                            | 0.21 (0.10; 0.44)***                                             |
| Sexual orientation                                | 0.04 (1.45, 1.09)                               | 0.04 (1.18, 0.91)                               | 0.04 (1.10, 1.06)                               | 1.12 (0.46; 2.72)                                                | 0.76 (0.15; 3.95)                                               | 3.03 (0.82; 11.20) <sup>o</sup>                                  |
| Traditional victimization                         | 0.30 (3.40, 0.45)***                            | 0.23 (2.20, 0.37)***                            | 0.18 (1.94, 0.44)***                            | 2.24 (1.70; 2.94)***                                             | 2.29 (1.71; 3.05)***                                            | 2.68 (1.93; 3.71)***                                             |
| Traditional victimization * sexual orientation    | -0.00 (-0.11, 1.24)                             | 0.05 (1.07, 1.09)                               | 0.05 (1.26, 1.20)                               | 0.99 (0.42; 2.34)                                                | 0.86 (0.32; 2.31)                                               | 0.66 (0.25; 1.74)                                                |
| <b>Moderation effects parenting styles</b>        |                                                 |                                                 |                                                 |                                                                  |                                                                 |                                                                  |
| Parental autonomy support                         | -0.08 (-0.94, 0.46)*                            | -0.08 (-0.86, 0.38)*                            | -0.06 (-0.68, 0.45)                             | 0.82 (0.59; 1.13)                                                | 0.69 (0.43; 1.12)                                               | 0.42 (0.23; 0.77)**                                              |
| Parental psychological control                    | 0.23 (2.61, 0.42)***                            | 0.22 (2.05, 0.35)***                            | 0.24 (2.63, 0.41)***                            | 2.17 (1.62; 2.91)***                                             | 1.97 (1.30; 3.00)**                                             | 2.03 (1.21; 3.41)**                                              |

|                                                                                          |                                                   |                                                   |                                                   |                                                                       |                                                                      |                                                                       |
|------------------------------------------------------------------------------------------|---------------------------------------------------|---------------------------------------------------|---------------------------------------------------|-----------------------------------------------------------------------|----------------------------------------------------------------------|-----------------------------------------------------------------------|
| Sexual orientation *<br>Parental autonomy<br>support                                     | 0.00 (0.01, 1.61)                                 | -0.01 (-0.23, 1.35)                               | -0.01 (-0.18, 1.57)                               | 2.08 (0.63; 6.84)                                                     | 3.70 (0.63; 21.90)                                                   | 15.72 (2.13;<br>115.78)**                                             |
| Sexual orientation *<br>Parental psychological<br>control                                | 0.06 (2.30, 1.58)                                 | 0.04 (1.43, 1.32)                                 | 0.05 (1.79, 1.54)                                 | 3.25 (0.88; 12.00) <sup>o</sup>                                       | 9.23 (1.34; 63.66)*                                                  | 3.79 (0.74; 19.43)                                                    |
| Traditional victimization<br>* Parental autonomy<br>support                              | 0.08 (1.10, 0.54)*                                | 0.00 (0.05, 0.45)                                 | 0.02 (0.23, 0.53)                                 | 1.25 (0.93; 1.71)                                                     | 1.43 (0.94; 2.11) <sup>o</sup>                                       | 1.31 (0.88; 1.95)                                                     |
| Traditional<br>victimization* Parental<br>psychological control                          | -0.03 (-0.33, 0.54)                               | -0.03 (-0.28, 0.40)                               | -0.05 (-0.62, 0.47)                               | 0.86 (0.65; 1.13)                                                     | 0.85 (0.61; 1.17)                                                    | 0.87 (0.63; 1.20)                                                     |
| Sexual orientation *<br>traditional victimization<br>* parental autonomy<br>support      | 0.02 (0.84, 1.34)                                 | 0.08 (2.37, 1.29)                                 | 0.09 (2.91, 1.50) <sup>o</sup>                    | 1.12 (0.30; 4.18)                                                     | 1.80 (0.14; 22.66)                                                   | 2.17 (0.20; 23.50)                                                    |
| Sexual orientation *<br>traditional victimization<br>* parental psychological<br>control | -0.02 (-0.62, 1.07)                               | -0.04 (-0.90, 0.89)                               | 0.00 (0.09, 1.04)                                 | 0.87 (0.40; 1.89)                                                     | 0.92 (0.30; 2.92)                                                    | 1.45 (0.43; 4.82)                                                     |
| <b>Parsimonious model<br/>results</b>                                                    |                                                   |                                                   |                                                   |                                                                       |                                                                      |                                                                       |
| <b>Model information</b>                                                                 | F(5, 953)=46.93,<br>p<0.001; R <sup>2</sup> =0.19 | F(4, 955)=49.49,<br>p<0.001; R <sup>2</sup> =0.17 | F(3, 958)=55.33,<br>p<0.001; R <sup>2</sup> =0.15 | -2LL= 875.21;<br>$\chi^2(3)=143.50$ ,<br>p<.001; R <sup>2</sup> =0.21 | -2LL= 468.89;<br>$\chi^2(7)=79.56$ , p<.001;<br>R <sup>2</sup> =0.18 | -2LL= 320.89;<br>$\chi^2(6)=102.71$ ,<br>p<.001; R <sup>2</sup> =0.29 |
|                                                                                          | <b><math>\beta</math> (B, UNSTANDARDIZED SE)</b>  |                                                   |                                                   | <b>ADJUSTED ODDS RATIO (95% CI)</b>                                   |                                                                      |                                                                       |
| Gender                                                                                   | -0.17 (-2.97, 0.50)***                            | -0.18 (-2.54,<br>0.42)***                         | -0.18 (-2.89,<br>0.49)***                         | 0.36 (0.25; 0.51)***                                                  | 0.45 (0.27; 0.75)**                                                  | 0.24 (0.12; 0.47)***                                                  |
| Sexual orientation                                                                       | /                                                 | /                                                 | /                                                 | /                                                                     | 0.55 (0.13; 2.32)                                                    | 3.43 (1.41; 8.38)**                                                   |
| Traditional victimization                                                                | 0.30 (3.40, 0.39)***                              | 0.23 (2.18, 0.29)***                              | 0.17 (1.87, 0.33)***                              | 2.07 (1.68; 2.55)***                                                  | 2.20 (1.70; 2.83)**                                                  | 2.17 (1.70; 2.76)**                                                   |

| <b>Moderation effects parenting styles</b>                 |                      |                       |                      |                      |                     |                      |
|------------------------------------------------------------|----------------------|-----------------------|----------------------|----------------------|---------------------|----------------------|
| Parental autonomy support                                  | -0.08 (-1.00, 0.42)* | -0.09 (-0.94, 0.35)** | /                    | /                    | 0.74 (0.49; 1.14)   | 0.52 (0.31; 0.88)*   |
| Parental psychological control                             | 0.24 (2.74, 0.38)*** | 0.23 (2.18, 0.32)***  | 0.29 (3.19, 0.33)*** | 2.32 (1.86; 2.90)*** | 1.76 (1.22; 2.56)** | 2.16 (1.40; 3.35)**  |
| Sexual orientation *<br>Parental autonomy support          | /                    | /                     | /                    | /                    | /                   | 7.24 (1.66; 31.53)** |
| Sexual orientation *<br>Parental psychological control     | /                    | /                     | /                    | /                    | 4.67(1.07; 20.43)*  | /                    |
| Traditional victimization *<br>* Parental autonomy support | 0.08 (1.08, 0.48)*   | /                     | /                    | /                    | 1.47 (1.05; 2.05)*  | /                    |

Controlled for main effects of age, gender, sexual orientation and victimization. R<sup>2</sup> in logistic regression analyses: Nagelkerke R<sup>2</sup>; R<sup>2</sup> in linear regression analyses: adjusted R<sup>2</sup>. ° p<.1; \* p<0.05; \*\* p<.01; \*\*\* p<.001

**Table S3.** Moderation analyses for parenting styles in the relation between cyberbullying victimization and sexual orientation on negative mental health outcomes and suicidal risk

|                                                   | Depression                                     | Anxiety                                        | Stress                                          | Suicidal ideation                                                | Suicidal plan                                                   | Suicidal attempt                                                 |
|---------------------------------------------------|------------------------------------------------|------------------------------------------------|-------------------------------------------------|------------------------------------------------------------------|-----------------------------------------------------------------|------------------------------------------------------------------|
| <b>Model information (non-parsimonious model)</b> | F(7, 918)=21.01, p<0.001; R <sup>2</sup> =0.13 | F(7, 919)=18.57, p<0.001; R <sup>2</sup> =0.12 | F(13, 881)=13.17, p<0.001; R <sup>2</sup> =0.15 | -2LL= 822.06; $\chi^2(13)=125.39$ , p<.001; R <sup>2</sup> =0.20 | -2LL= 420.26; $\chi^2(13)=94.12$ , p<.001; R <sup>2</sup> =0.23 | -2LL= 294.01; $\chi^2(13)=106.06$ , p<.001; R <sup>2</sup> =0.31 |
|                                                   | <b>β (B, UNSTANDARDIZED SE)</b>                |                                                |                                                 | <b>ADJUSTED ODDS RATIO (95% CI)</b>                              |                                                                 |                                                                  |
| Age                                               | 0.05 (0.22, 0.15)                              | 0.03 (0.10, 0.12)                              | 0.04 (0.19, 0.14)                               | 0.95 (0.85; 1.05)                                                | 0.90 (0.77; 1.06)                                               | 0.90 (0.74; 1.11)                                                |
| Gender                                            | -0.17 (-2.85, 0.53)***                         | -0.17 (-2.40, 0.44)***                         | -0.18 (-2.85, 0.51)***                          | 0.40 (0.28; 0.57)***                                             | 0.44 (0.25; 0.76)**                                             | 0.27 (0.13; 0.55)***                                             |
| Sexual orientation                                | 0.07 (2.22, 1.10)*                             | 0.06 (1.65, 0.91)°                             | 0.04 (1.41, 1.06)                               | 1.52 (0.71; 3.25)                                                | 1.05 (0.26; 4.27)                                               | 3.04 (0.89; 10.42)°                                              |

|                                                                                   |                                |                                |                                  |                      |                                 |                                |
|-----------------------------------------------------------------------------------|--------------------------------|--------------------------------|----------------------------------|----------------------|---------------------------------|--------------------------------|
| Cyberbullying victimization                                                       | 4.56 (0.81, 0.24)***           | 0.25 (3.91, 0.67)***           | 0.20 (3.59, 0.77)***             | 2.70 (1.67; 4.39)*** | 4.24 (2.49; 7.24)***            | 4.26 (2.38; 7.61)***           |
| Cyberbullying victimization * sexual orientation                                  | 0.10 (5.48, 4.06)              | 0.11 (4.85, 3.35)              | 0.03 (1.54, 3.89)                | 1.78 (0.19; 16.77)   | 0.52 (0.01; 19.21)              | 0.39 (0.01; 13.77)             |
| <b>Moderation effects parenting styles</b>                                        |                                |                                |                                  |                      |                                 |                                |
| Parental autonomy support                                                         | -0.08 (-1.02, 0.47)*           | -0.09 (-0.91, 0.39)*           | -0.06 (-0.75, 0.45) <sup>°</sup> | 0.81 (0.59, 1.11)    | 0.74 (0.45; 1.20)               | 0.44 (0.24; 0.81)**            |
| Parental psychological control                                                    | 0.24 (2.80, 0.43)***           | 0.23 (2.14, 0.35)***           | 0.25 (2.70, 0.41)***             | 2.22 (1.67; 2.96)*** | 1.98 (1.30; 3.02)**             | 2.03 (1.23; 3.36)**            |
| Sexual orientation * Parental autonomy support                                    | 0.01 (0.14, 1.72)              | -0.01 (-0.50, 1.42)            | -0.02 (-0.73, 1.65)              | 1.87 (0.59; 6.01)    | 2.61 (0.40; 17.04)              | 10.50 (1.17; 94.56)*           |
| Sexual orientation * Parental psychological control                               | 0.03 (1.06, 1.64)              | -0.00 (-0.14, 1.35)            | 0.02 (0.63, 1.57)                | 2.07 (0.61; 7.00)    | 5.48 (0.91; 33.18) <sup>°</sup> | 2.54 (0.46; 14.02)             |
| Cyberbullying victimization * Parental autonomy support                           | 0.08 (1.34, 0.78) <sup>°</sup> | 0.08 (1.12, 0.64) <sup>°</sup> | 0.08 (1.36, 0.75) <sup>°</sup>   | 1.38 (0.86; 2.22)    | 2.01 (1.10; 3.70)*              | 1.70 (0.94; 3.07) <sup>°</sup> |
| Cyberbullying victimization * Parental psychological control                      | 0.03 (0.66, 0.68)              | 0.01 (0.19, 0.56)              | 0.01 (0.16, 0.65)                | 1.12 (0.72; 1.73)    | 1.33 (0.72; 2.50)               | 1.23 (0.75; 2.04)              |
| Sexual orientation * Cyberbullying victimization * parental autonomy support      | 0.09 (3.75, 4.09)              | 0.05 (1.77, 3.38)              | -0.05 (-1.87, 3.93)              | 1.24 (0.25; 6.03)    | 0.15 (0.00; 24.52)              | 0.08 (0.00; 14.41)             |
| Sexual orientation * Cyberbullying victimization * parental psychological control | 0.00 (0.05, 3.31)              | 0.07 (3.09, 2.73)              | 0.12 (6.16, 3.17) <sup>°</sup>   | 0.76 (0.12; 4.79)    | 4.14 (0.03; 513.20)             | 10.79 (0.07; 1572.66)          |

| <b>Parsimonious model results</b>                            |                                                   |                                                   |                                                   |                                                                       |                                                                      |                                                                      |
|--------------------------------------------------------------|---------------------------------------------------|---------------------------------------------------|---------------------------------------------------|-----------------------------------------------------------------------|----------------------------------------------------------------------|----------------------------------------------------------------------|
| <b>Model information</b>                                     | F(6, 945)=32.02,<br>p<0.001; R <sup>2</sup> =0.16 | F(5, 955)=36.31,<br>p<0.001; R <sup>2</sup> =0.16 | F(8, 945)=21.10,<br>p<0.001; R <sup>2</sup> =0.14 | -2LL= 897.58;<br>$\chi^2(3)=116.10$ ,<br>p<.001; R <sup>2</sup> =0.18 | -2LL=464.95;<br>$\chi^2(5)= 79.94$ ,<br>p<.001; R <sup>2</sup> =0.19 | -2LL= 336.69;<br>$\chi^2(4)=87.06$ ,<br>p<.001; R <sup>2</sup> =0.24 |
|                                                              | <b><math>\beta</math> (B, UNSTANDARDIZED SE)</b>  |                                                   |                                                   | <b>ADJUSTED ODDS RATIO (95% CI)</b>                                   |                                                                      |                                                                      |
| Gender                                                       | -0.17 (-2.85, 0.51)***                            | -0.17 (-2.40, 0.43)***                            | -0.17 (-2.79, 0.49)***                            | 0.39 (0.28; 0.55)***                                                  | 0.49 (0.29; 0.81)**                                                  | 0.28 (0.14; 0.53)***                                                 |
| Sexual orientation                                           | 0.07 (2.19, 1.00)*                                | /                                                 | 0.05 (1.70, 1.01) <sup>o</sup>                    | /                                                                     | /                                                                    | 2.75 (1.18; 6.42)*                                                   |
| Cyberbullying victimization                                  | 0.25 (4.72, 0.78)***                              | 0.25 (4.11, 0.65)**                               | 0.15 (2.69, 0.59)**                               | 2.30 (1.65; 3.22)***                                                  | 4.72 (2.78; 8.01)***                                                 | 3.32 (2.27; 4.86)***                                                 |
| <b>Moderation effects parenting styles</b>                   |                                                   |                                                   |                                                   |                                                                       |                                                                      |                                                                      |
| Parental autonomy support                                    | -0.08 (-1.05, 0.43)*                              | -0.10 (-1.02, 0.36)**                             | /                                                 | /                                                                     | 0.80 (0.51; 1.24)                                                    | /                                                                    |
| Parental psychological control                               | 0.25 (2.88, 0.39)***                              | 0.24 (2.23, 0.32)***                              | 0.29 (3.17, 0.34)***                              | 2.43 (1.95; 3.04)***                                                  | 2.18 (1.51; 3.13)***                                                 | 2.99 (2.05; 4.36)***                                                 |
| Cyberbullying victimization * Parental autonomy support      | 0.09 (1.55, 0.71)*                                | 0.09 (1.40, 0.60)*                                | /                                                 | /                                                                     | 1.85 (1.17; 2.91)**                                                  | /                                                                    |
| Cyberbullying victimization * sexual orientation             | /                                                 | /                                                 | 0.06 (3.16, 2.08)                                 | /                                                                     | /                                                                    | /                                                                    |
| Sexual orientation * parental psychological control          | /                                                 | /                                                 | 0.02 (0.75, 1.37)                                 | /                                                                     | /                                                                    | /                                                                    |
| Cyberbullying victimization * parental psychological control | /                                                 | /                                                 | -0.11 (-0.22, 0.64)                               | /                                                                     | /                                                                    | /                                                                    |
| Sexual orientation * Cyberbullying                           | /                                                 | /                                                 | 0.11 (5.66, 2.08)**                               | /                                                                     | /                                                                    | /                                                                    |

---

victimization \* parental  
psychological control

---

Controlled for main effects of age, gender, sexual orientation and victimization. R<sup>2</sup> in logistic regression analyses: Nagelkerke R<sup>2</sup>; R<sup>2</sup> in linear regression analyses: adjusted R<sup>2</sup>. ° p<.1; \* p<0.05; \*\* p<.01; \*\*\* p<.001
